# Supplementary material for: Carboxylic acid functionalization prevents the translocation of multi-walled carbon nanotubes at predicted environmentally relevant concentrations into targeted organs of nematode Caenorhabditis elegans
Source: Royal Society of Chemistry journal article supplement (doi:10.1039/c3nr00847a), 2013-01-01
Supplement: c3nr00847a.pdf [file c3nr00847a.pdf]

**Supplementary Information:**

**Supplementary Figure 1:**

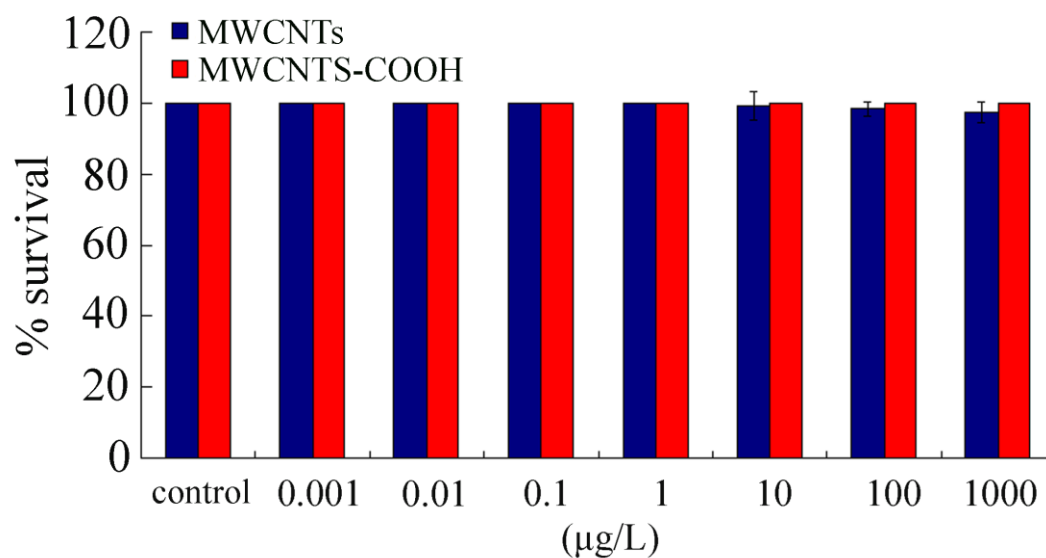

**Supplementary Figure 1.** Comparison of survivals in MWCNTs-COOH exposed nematodes from those in MWCNT exposed nematodes. The exposure was performed from L1-larvae to adult. Bars represent mean  $\pm$  S.E.M.

**Supplementary Figure 2:**

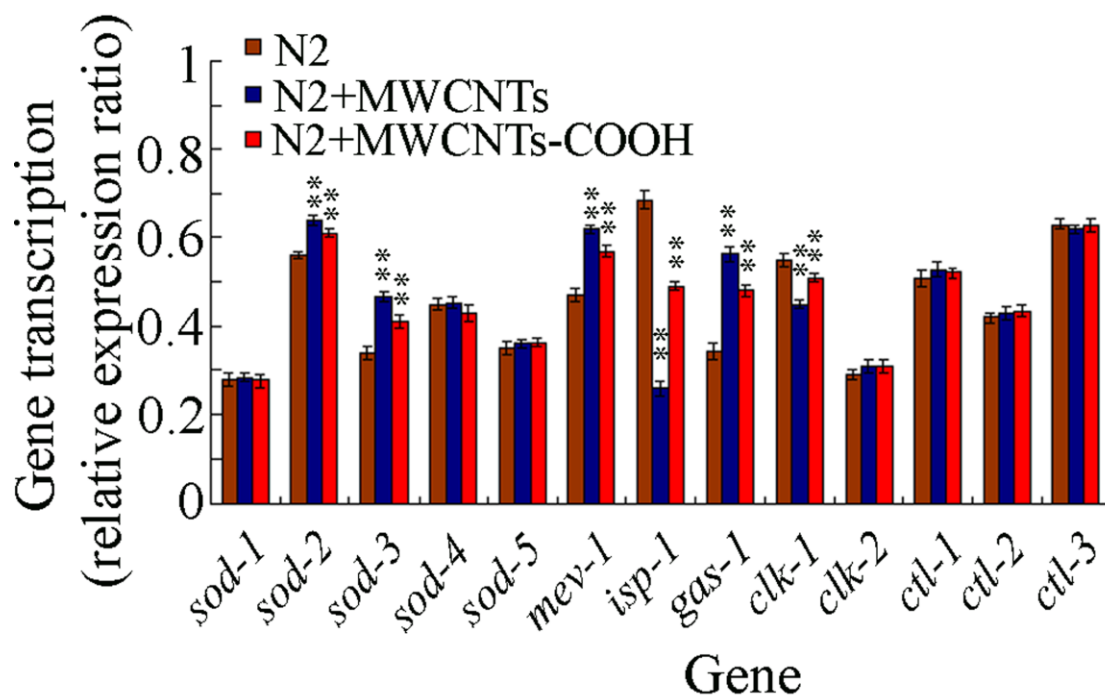

**Supplementary Figure 2.** Comparison of expression patterns of genes required for oxidative stress in nematodes exposed to 1 mg L<sup>-1</sup> of MWCNTs and MWCNTs-COOH. The exposure was performed from L1-larvae to adult. Bars represent mean  $\pm$  S.E.M. \*\*  $P < 0.01$ .

**Supplementary Figure 3:**

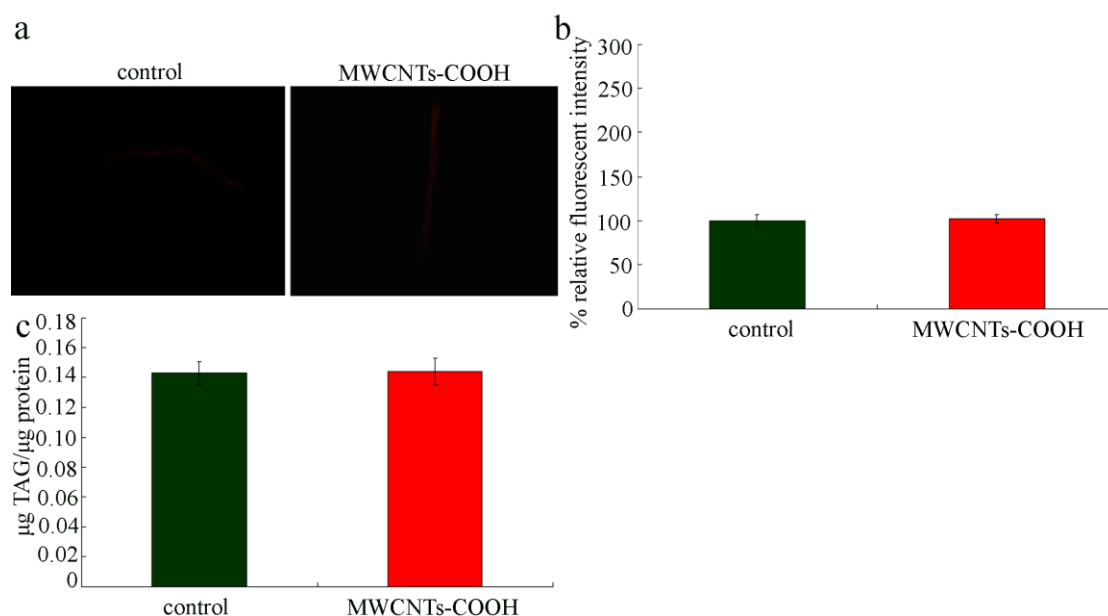

**Supplementary Figure 3.** Exposure to  $10 \mu\text{g L}^{-1}$  of MWCNTs-COOH induced the similar fat storage to that of control in nematodes. a) Nile Red staining of control and MWCNTs-COOH exposed nematodes. b) Comparison of relative fluorescent intensities of Nile Red in control and MWCNTs-COOH exposed nematodes. c) Comparison of triglyceride amount of control and MWCNTs-COOH exposed nematodes. The exposure was performed from L1-larvae to adult. Bars represent mean  $\pm$  S.E.M.

**Supplementary Table 1.** Primers used for quantitative real-time polymerase chain reaction (PCR)

| Gene         | Forward primer           | Reverse primer           |
|--------------|--------------------------|--------------------------|
| <i>act-1</i> | CTGCAGATGTGTGACGACGAGGTT | CTGCAGGAAGCACTTGCGGTGAAC |
| <i>clk-1</i> | CACATACTGCTGCTTCTCGT     | TGAACCAACAGATGAACCTT     |
| <i>clk-2</i> | TATCCTTTGTTGGTTTTGCC     | CAAATACACTCTACACCGCA     |
| <i>ctl-1</i> | CTCCTACACGGACACGCAT      | GCATCTCCCTGGCTTTCAT      |
| <i>ctl-2</i> | CGAACAGCTTCAACTATGG      | GTGGCTGGGAATGTGGTAT      |
| <i>ctl-3</i> | TTCTCCTACACGGACACGC      | GCATCTCCCTGGCTTTCAT      |
| <i>gas-1</i> | CTTGGTCTTTGGCTGTTGA      | CTTGGTCTTTGGCTGTTGA      |
| <i>isp-1</i> | GCAGAAAGATGAATGGTCC      | CAGAAGCGTCGTAGTGAGA      |
| <i>mev-1</i> | GGAATTCGCTTCTTAGGAT      | GCAGTCTTGTTGCTCTTGT      |
| <i>sod-1</i> | ACGCTCGTCACGCTTAC        | TCTTCTGCCTTGTCTCCG       |
| <i>sod-2</i> | GGCATCAACTGTCGCTGT       | ACAAGTCCAGTTGTTGCC       |
| <i>sod-3</i> | TGACATCACTATTGCGGT       | GGGACCATTCCTTCCAAA       |
| <i>sod-4</i> | CACCAGATGACTCGAACA       | AATGAGGCAAGAGAGTCG       |
| <i>sod-5</i> | ATATTGCCAATGCCGTTT       | CTCTTCACCTTCGGCTTT       |
